# Supplementary material for: Biomarkers for Immunotherapy in Poorly Differentiated Sinonasal Tumors
Source: MDPI journal article supplement (doi:10.3390/biomedicines10092205), 2022-09-06

**SUPPLEMENTARY MATERIALS**

**Biomarkers of response to immunotherapy in poorly differentiated sinonasal carcinomas**

Eva Villanueva-Fernández<sup>1</sup>, Mario A. Hermsen<sup>2</sup>, Laura Suárez-Fernández<sup>2</sup>, Blanca Vivanco<sup>3</sup>, Alessandro Franchi<sup>4</sup>, Rocío García-Marín<sup>2</sup>, Virginia N. Cabal<sup>2</sup>, Helena Codina-Martínez<sup>2</sup>, Sara Lucila Lorenzo-Guerra<sup>2</sup>, José L. Llorente<sup>1</sup>, Fernando López<sup>1</sup>.

**Table S1.** PMS2, MLH1, MSH2 and MSH6 staining pattern in 5 cases designated as MSI positive.

|                | PMS2     | MLH1     | MSH2     | MSH6     |
|----------------|----------|----------|----------|----------|
| SNEC patient 1 | negative | reduced  | positive | positive |
| SNEC patient 2 | negative | negative | negative | negative |
| SNUC patient 1 | negative | reduced  | reduced  | reduced  |
| SNUC patient 2 | negative | negative | reduced  | reduced  |
| HG-non-ITAC    | reduced  | reduced  | positive | positive |

**Figure S1.** Representative images of SMARCB1-deficient carcinoma (**A–D**), SMARCA4-deficient carcinoma (**E–H**) and NUT carcinoma (**I–L**) showing hematoxylin and eosin staining (**A,E,I**), SmarCB1 expression (**B**), SmarCA4 expression (**F**) and NUT1 expression (**J**), as well as CD8+ TILs (**C,G,K**) and PD-L1 (**D,H,L**). All images ×200 magnification.

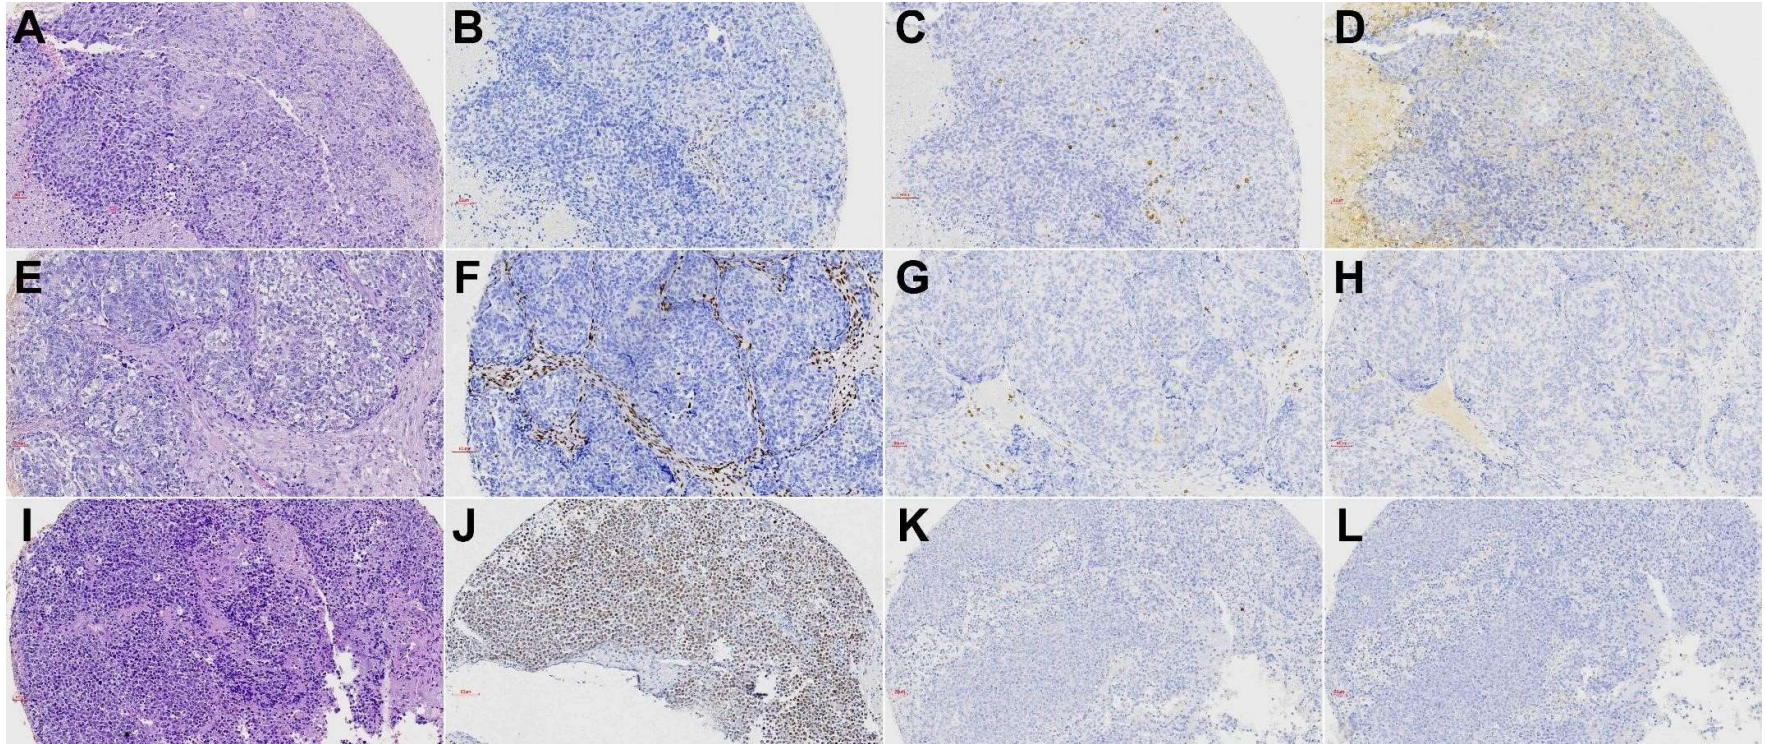

Supplement: s1 [file s1]
